# Supplementary material for: Efficacy of Telephone-Based Cognitive Behavioral Therapy for Weight Loss, Disordered Eating, and Psychological Distress After Bariatric Surgery: A Randomized Clinical Trial
Source: PubMed Central journal article supplement (PMC10401302; doi:10.1001/jamanetworkopen.2023.27099), 2023-08-03

## Supplemental Online Content

Sockalingam S, Leung SE, Ma C, et al. Efficacy of telephone-based cognitive behavioral therapy for weight loss, disordered eating, and psychological distress after bariatric surgery: a randomized clinical trial. *JAMA Netw Open*. 2023;6(8):e2327099. doi:10.1001/jamanetworkopen.2023.27099

**eTable 1.** Raw Means for Clinical Variables

**eFigure.** Estimated Mean Outcomes From a Linear Mixed Model Comparing Emotional Eating Scale Total Score

This supplemental material has been provided by the authors to give readers additional information about their work.

**eTable.** Raw means  $\pm$  standard deviations for clinical variables between Tele-CBT and Control groups at baseline, post-intervention, and 3-month follow-up.

| Measure          | Baseline                 |                         | Post-Intervention        |                         | Follow-Up                |                         |
|------------------|--------------------------|-------------------------|--------------------------|-------------------------|--------------------------|-------------------------|
|                  | Tele-CBT<br>Mean<br>(SD) | Control<br>Mean<br>(SD) | Tele-CBT<br>Mean<br>(SD) | Control<br>Mean<br>(SD) | Tele-CBT<br>Mean<br>(SD) | Control<br>Mean<br>(SD) |
| <b>%TWL</b>      | N/A                      | N/A                     | 1.44<br>(4.13)           | 1.11<br>(3.56)          | 1.01<br>(6.21)           | 0.95<br>(5.54)          |
| <b>BES</b>       | 13.31<br>(8.70)          | 13.45<br>(8.64)         | 8.03<br>(6.21)           | 12.83<br>(9.53)         | 9.43<br>(7.52)           | 12.42<br>(9.52)         |
| <b>EES-Total</b> | 49.93<br>(18.39)         | 50.99<br>(22.40)        | 40.23<br>(15.72)         | 49.20<br>(22.99)        | 41.98<br>(15.58)         | 49.94<br>(22.23)        |
| <b>PHQ-9</b>     | 5.73<br>(4.86)           | 5.94<br>(4.77)          | 3.60<br>(3.95)           | 6.24<br>(5.33)          | 4.51<br>(4.71)           | 6.79<br>(5.69)          |
| <b>GAD-7</b>     | 4.75<br>(3.93)           | 4.78<br>(4.20)          | 2.94<br>(3.14)           | 5.37<br>(5.35)          | 3.40<br>(3.70)           | 5.40<br>(5.24)          |

%TWL: post-operative percent total weight loss; BES: Binge Eating Scale; EES-Total: Emotional Eating Scale total score; PHQ-9: Patient Health Questionnaire 9-item scale; GAD-7: Generalized Anxiety Disorders 7-item scale.

**eFigure.** Estimated mean outcomes ( $\pm$  standard errors) from a linear mixed model comparing EES-Total (Emotional Eating Scale total score) between the Tele-CBT and Control groups over time. Timepoints 1, 2, and 3 refer to Baseline (1-year post-surgery), post-intervention ( $\sim$ 15-months post-surgery), and 3-month follow-up ( $\sim$ 18-months post-surgery), respectively.  $p$ -values refer to the group by time interaction.

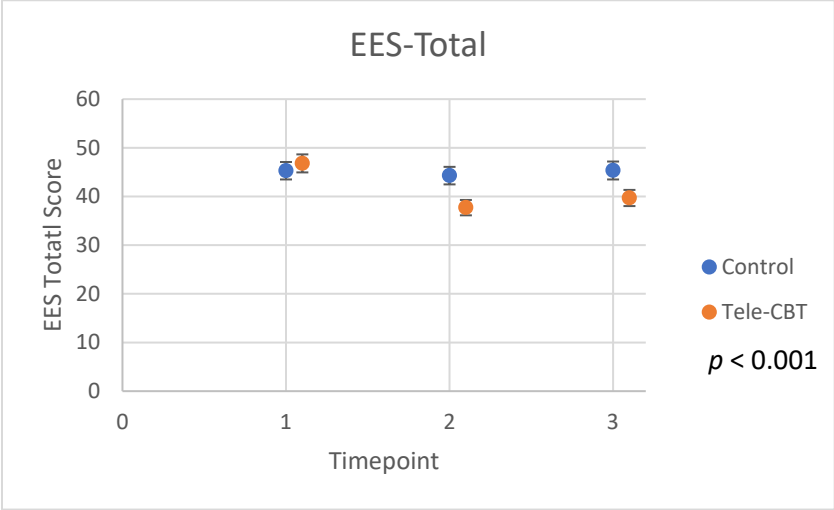

Supplement: jamanetwopen-e2327099-s002.pdf [file jamanetwopen-e2327099-s002.pdf]
