# Supplementary material for: Efficacy of Telephone-Based Cognitive Behavioral Therapy for Weight Loss, Disordered Eating, and Psychological Distress After Bariatric Surgery: A Randomized Clinical Trial
Source: PubMed Central journal article supplement (PMC10401302; doi:10.1001/jamanetworkopen.2023.27099), 2023-08-03
Supplement: jamanetwopen-e2327099-s001.pdf [file jamanetwopen-e2327099-s001.pdf]

# Telephone-Based Cognitive Behavioural Therapy for Post-Operative Bariatric Surgery Patients: A Randomized Controlled Trial

Protocol November 14, 2017

## Investigators:

Dr. Sanjeev Sockalingam (Nominated PI)  
Dr. Stephanie Cassin (co-PI)  
Dr. Raed Hawa  
Dr. Susan Wnuk  
Dr. Timothy Jackson  
Dr. Lorraine Lipscombe  
Dr. Allan Okrainec  
Dr. George Tomlinson  
Dr. David Urbach

## Rationale and Background:

Obesity is Canada's fastest growing public health problem.<sup>1</sup> Over the past 20 years, obesity has surpassed smoking as the leading cause of preventable death in developed countries, and has surpassed under-nutrition and infectious disease as the most significant predictor of ill health and disease.<sup>2,3</sup> The World Health Organization defines obesity as a body mass index (BMI) of 30 kg/m<sup>2</sup> or greater: Class I obesity (BMI 30-34.9 kg/m<sup>2</sup>), Class II obesity (BMI 35-39.9 kg/m<sup>2</sup>), and Class III or "extreme" obesity (BMI > 40 kg/m<sup>2</sup>).<sup>4</sup> Of the 1 in 4 Canadians with obesity,<sup>5</sup> approximately 1.07 million Canadians have the most rapidly increasing Class III obesity, and an additional 2.0 million have class II obesity.<sup>6,7</sup> Obesity is associated with significant medical comorbidities and has a high rate of mortality.<sup>8-10</sup>

Empirically supported treatment options for obesity include pharmacotherapy, multi-component behavioural lifestyle interventions, and surgical interventions.<sup>11</sup> Bariatric surgery, a procedure that restricts the stomach's capacity for food and/or limits the absorption of food, is the most effective treatment for patients with Class II and Class III obesity. Major clinical guidelines recommend bariatric surgery for individuals with a BMI > 40 kg/m<sup>2</sup>, and those with a BMI > 35 kg/m<sup>2</sup> and significant obesity-related medical comorbidities.<sup>11</sup> Accordingly, the demand for bariatric surgery has been rapidly increasing.<sup>12,13</sup> The Ontario Ministry of Health and Long Term Care responded by investing \$75 million to increase bariatric surgery capacity by 500% over 3 years and created the Ontario Bariatric Network (OBN).

The most frequently performed bariatric surgery is the Roux-en-Y gastric bypass.<sup>12,14,15</sup> Patients who undergo this procedure lose an average of 20 to 30% of their total body weight,<sup>16,17</sup> and experience dramatic improvements or complete resolution of many of their medical comorbidities including type 2 diabetes mellitus (T2DM: 77%), hypertension (62%), and obstructive sleep apnea (86%).<sup>18,19</sup> However, **weight change trajectories are highly variable.**<sup>20</sup> Approximately 50% of patients experience some weight regain in the first 2 years,<sup>21</sup> and 24% experience weight regain that is considerable relative to their overall weight loss by 3 years post-

45 surgery.<sup>22</sup> Moreover, **weight regain is associated with relapse of obesity-related**  
46 **comorbidities.**<sup>22,23</sup>

47 While bariatric surgery is effective in reducing weight and improving many obesity  
48 related comorbidities, it **does not directly target the underlying behavioural and**  
49 **psychological factors that potentially contribute to the development and maintenance of**  
50 **obesity.** Psychosocial factors play an important role in long-term outcomes.<sup>24,25</sup> High rates of  
51 psychiatric comorbidity have been documented in bariatric patients.<sup>26</sup> Post-operative eating  
52 pathology and depression are among the most consistent negative predictors of weight loss  
53 outcomes.<sup>24,25</sup> These factors also predispose to obesity, thus, they need to be targeted alongside  
54 bariatric surgery to prevent relapse.

55 Psychosocial interventions are increasingly being recommended in the clinical  
56 management of bariatric patients.<sup>21,27,28</sup> Although no “best practices” have been established,  
57 review papers and metaanalyses suggest that Cognitive Behavioural Therapy (CBT) targeting  
58 disordered eating and psychological factors offers the greatest promise.<sup>27,28</sup> Cognitive  
59 behavioural therapy incorporates both behavioural interventions (e.g., food monitoring, weekly  
60 weighing, goal setting, behavioural activation, stimulus control, environmental contingencies)  
61 and cognitive interventions (e.g., identifying, challenging, and altering counterproductive  
62 thoughts). Major clinical guidelines recommend CBT as a first-line treatment for many of the  
63 psychological disorders that are prevalent among bariatric surgery patients, including  
64 depression<sup>29</sup> and binge eating disorder,<sup>30</sup> and empirical research also supports the efficacy of  
65 CBT for weight management.<sup>31-34</sup>

66 A number of uncontrolled trials and randomized controlled trials have examined CBT  
67 specifically in bariatric surgery populations. A systematic review and meta-analysis of  
68 randomized and unrandomized trials reported significant improvements in binge eating,  
69 depression, anxiety, and quality of life following CBT interventions in bariatric populations.<sup>28</sup> A  
70 more recent review examining psychosocial interventions pre and post-bariatric surgery arrived  
71 at the same conclusion, but further noted that the **evidence was stronger for post-operative**  
72 **interventions.**<sup>27</sup> Small sample sizes and high attrition rates were noted as common limitations in  
73 both reviews.<sup>27,28</sup> Of note, the psychosocial interventions examined to date have relied  
74 exclusively on face-to-face treatment sessions, with the exception of two studies that  
75 incorporated the use of telephone sessions and recommended further exploration of telephone-  
76 based interventions in bariatric surgery populations.<sup>35,36</sup>

77 **Why use Telephone-Based Interventions?:** Travelling for appointments is difficult for  
78 bariatric patients who often reside great distances from bariatric programs and have mobility  
79 challenges secondary to obesity.<sup>37,38</sup> At the Toronto Western Hospital Bariatric Surgery Program  
80 (TWH-BSP), patients travel an average of 138.5 kilometers (range: 2.0 to 1734.0 kilometers) to  
81 the program,<sup>39</sup> so many cannot feasibly attend weekly therapy sessions. Approximately 70% of  
82 bariatric patients adhere to in person 12-month post-surgery appointments in our program, and  
83 50% adhere to in-person 24- month appointments.<sup>39</sup> Travel distance is inversely associated with  
84 post-operative attrition, further reinforcing the need for psychosocial treatment modalities that  
85 can overcome this barrier.<sup>40,41</sup> Novel methods for delivering CBT, such as Tele-CBT, obviate the  
86 need for travel and improve access because treatments can be delivered during the evenings and  
87 weekends, eliminating the need to take time off work or find childcare.<sup>42</sup> A systematic review  
88 reported positive outcomes in 83% of studies examining the impact of telephone-based  
89 interventions on dietary behaviours.<sup>43</sup> Tele-CBT has been shown efficacious in treating various  
90 forms of psychopathology that are common among bariatric surgery patients, including

91 depression and binge eating disorder.<sup>44-47</sup> In addition, patients who receive Tele-CBT report  
92 comparable levels of treatment satisfaction to those who receive face-to-face CBT,<sup>48</sup> and they  
93 have lower rates of attrition,<sup>49</sup> suggesting that Tele-CBT is an acceptable form of treatment. A  
94 recent Technical Brief prepared for the U.S. Department of Health, which reviewed the findings  
95 from<sup>50</sup> systematic reviews of telehealth interventions, concluded that the most consistent benefit  
96 has been reported when telehealth has been used to counsel patients with chronic health  
97 conditions or to provide psychotherapy as part of behavioural health.<sup>51</sup> Although no randomized  
98 controlled trials conducted to date have examined the efficacy of telephone-based interventions  
99 for the management of severe obesity, all indications suggest that Tele-CBT has the potential to  
100 improve patient outcomes following bariatric surgery.

101 **Pilot Study:** Our team developed a manual-based Tele-CBT protocol<sup>52</sup> and conducted a  
102 series of pilot studies to examine the feasibility, acceptability, and efficacy of the protocol.<sup>52-54</sup>  
103 We first conducted a small prepilot study ( $N = 8$ ; 2 pre-op, 6 post-op; 6 face-to-face, 2 telephone)  
104 to validate the manual and examine the feasibility and acceptability of the protocol.<sup>52</sup> Patients  
105 reported a high level of satisfaction with CBT, and experienced improvements in binge eating,  
106 loss of control over eating, and emotional eating immediately following the intervention. Minor  
107 modifications were made to the protocol based on client and clinician feedback. We  
108 subsequently conducted a pilot RCT in which bariatric patients ( $N = 47$ ) received Tele-CBT  
109 either pre-operatively,<sup>53</sup> or 6 months post-operatively.<sup>54</sup> Participants in both groups reported  
110 significant improvements in binge eating, emotional eating, depression, and anxiety following  
111 the intervention, with large to very large effect sizes reported from pre- to post-treatment on each  
112 measure. However, participants favoured a post-operative intervention and recommended that it  
113 be offered following the “honeymoon period” of weight loss. Of note, this patient feedback  
114 corroborates the recommendation made by a recent review paper that psychosocial interventions  
115 be delivered in the post-operative period, following the “honeymoon period” but prior to  
116 significant weight regain.<sup>27</sup> Qualitative feedback from our patients indicates that the majority  
117 believe 1 year postsurgery to be the ideal period for intervention. We subsequently received  
118 CIHR bridge funds to conduct a pilot study examining Tele-CBT 1 year post-surgery. Patients ( $N$   
119 = 21) in this study similarly reported improvements in eating pathology and depression, as well  
120 as high level of treatment satisfaction. Collectively, our pilot studies suggest that recruitment is  
121 achievable, delivery of CBT by telephone is feasible, patients report a high level of treatment  
122 satisfaction and improvements in eating pathology and psychological distress immediately  
123 following the intervention, and patients and clinicians recommend that CBT be delivered  
124 approximately 1 year following surgery. Thus, we have laid the foundation for our proposed  
125 RCT, which will examine whether Tele-CBT delivered 1 year post-surgery is efficacious in  
126 optimizing weight loss and improving physical and psychological functioning up to 3 years post-  
127 surgery.

### 128 **Purpose of Study:**

131 The **primary objective** of this 2-arm RCT is to examine the efficacy of Tele-CBT (7 sessions  
132 delivered 12 months following surgery) as an adjunctive treatment to the usual standard of  
133 bariatric care in optimizing weight loss and improving medical burden, eating pathology,  
134 psychological distress, and quality of life. Participants identified as meeting the study  
135 inclusion/exclusion criteria will be randomly assigned to either: 1) Treatment-As-Usual (TAU)  
136 Control group (i.e., bariatric surgery + routine clinic visits), or 2) Tele-CBT (i.e., bariatric

137 surgery + routine clinic visits + post-operative Tele-CBT).

138

139 The **secondary objective** is to examine improvements in medical burden, eating pathology,  
140 psychological distress, and quality of life.

141

#### 142 **Outcome Measures:**

143

144 The primary outcome will be weight measured in kilograms. The secondary outcomes measures  
145 will be obesity related comorbidities and changes in eating pathology, as well as changes in  
146 depression, anxiety and quality of life. See measures in Appendix.

147

#### 148 **Hypotheses:**

149

- 150 1. Tele-CBT will lead to significantly lower weight 2 and 3 years following surgery  
151 compared to standard care.
- 152 2. Tele-CBT will lead to alleviation of medical burden and improvements in eating  
153 pathology, psychological distress, and quality of life extending to 3 years following  
154 surgery compared to standard care.

155

156

#### 157 **Methods**

158

##### 159 **Participants:**

160

161 Recruitment during our pilot studies suggests that 350 participants (and 248 completers)  
162 is a feasible recruitment goal over this time period, with 200 participants to be recruited from  
163 Toronto Western Hospital and 150 participants to be recruited from Humber River Hospital. We  
164 have completed several pilot studies on Tele-CBT, thus, our research infrastructure is already set  
165 up. We plan to recruit 144 participants per year for the first 2.5 years of the study. Recruitment  
166 will end in the latter half of year 3, and primary and secondary outcomes will be assessed for the  
167 final 2 years of the study. To be eligible for bariatric surgery at Toronto Western Hospital,  
168 patients must be over the age of 18 and have a body mass index of 35 kg/m<sup>2</sup> or greater. All  
169 bariatric surgery candidates who meet the study inclusion/exclusion criteria will be eligible for  
170 participation

171

##### 172 Inclusion criteria:

173

- 173 1. Age 18 to 65 years
- 174 2. Received bariatric surgery 1 year ago
- 175 3. Fluent in English
- 176 4. Have Internet access to complete online questionnaires

177

##### 178 Exclusion criteria:

179

- 179 1. Current active suicidal ideation
- 180 2. Current poorly controlled psychiatric illness that would render Tele-CBT very difficult,  
181 including serious mental illness (i.e., psychotic disorder, bipolar disorder), severe  
182 depression (i.e., current major depressive episode diagnosis and Patient Health

- 183 Questionnaire [PHQ-9]<sup>58</sup> score > 20), or severe anxiety (i.e., current anxiety disorder  
184 diagnosis and Generalized Anxiety Disorder [GAD-7]<sup>59</sup> score >15);  
185 3. Current poorly controlled medical illness that would render Tele-CBT very difficult.  
186

187 Of note, patients in the Bariatric Surgery Program who have active suicidal ideation, serious  
188 mental illness, severe depression, or severe anxiety do not receive bariatric surgery until their  
189 psychiatric symptoms stabilize. Thus, the vast majority patients who are currently considered  
190 appropriate candidates for bariatric surgery will be eligible for participation in this study. In the  
191 event that participants develop significant mental health issues (e.g., active suicidal ideation,  
192 serious mental illness) during the research study, a consultation will be arranged with one of the  
193 staff psychiatrists in the program.  
194

### 195 196 **Sample Size and Statistical Analysis:**

197  
198 The study employs a 2-arm RCT design. Participants' weights will be measured at 5 time  
199 points (1, 1.25, 1.5, 2, and 3 years post-surgery). The primary goal is to determine if the mean  
200 weights differ between the Tele-CBT and TAU Control groups at 2 years post-surgery. In  
201 previous research on the impact of CBT programs, weight loss is typically in the range of 7.5%  
202 to 10%.<sup>31,32</sup> Discussion with bariatric surgeons has indicated that a difference of 5% in weight  
203 loss would be impressive enough to warrant a program to implement CBT. In our clinic data, we  
204 find that the mean weight at 2 years postoperation is 92kg, the correlation between 1 and 2 year  
205 weights is 0.8, and the between-subject standard deviation at 1 year and 2-years is 21kg. A 5%  
206 difference in weight at 2 years (equivalently, a difference in 1 to 2 year weight change equal to  
207 5% of the 2-year weight) is a clinically important difference and translates to approximately  
208 4.5kg. With a type I error rate of 5%, if the true difference in weights between the Control and  
209 Tele-CBT groups at 2 years is 4.5kg, a sample size of 124 per group gives 80% power in an  
210 analysis of covariance with 1 year weight as the covariate. Anticipating up to 30% loss to follow-  
211 up or withdrawal between 1 and 2 years, we will enroll 175 participants per group.

212 Each year, the TWH-BSP reassesses 336 patients at 1 year post-op. We plan to recruit for  
213 2.5 years; thus, as many as 840 patients will be approached to participate over the recruitment  
214 period. Based on our pilot studies, we estimate that 50% of participants approached will be  
215 eligible to participate and interested in receiving CBT (as many as 168 per year; 420 across 2.5  
216 years). In order to ensure 248 study completers, we will recruit 350 participants to conservatively  
217 account for up to 30% of participants withdrawing during treatment or lost to follow-up.

218 The **primary analysis** will compare mean weights in the Tele-CBT and TAU Control  
219 groups at 2 years post-surgery using analysis of covariance, with 1-year post-surgery weight and  
220 stratification variables sex and recruitment site as the covariates. We will investigate individual  
221 patient weight trajectories over time (1 year [pre-CBT], 1.25 years [post-CBT], 1.5 years, 2  
222 years, and 3 years postsurgery). We will plot these trajectories, investigating patterns in each of  
223 the groups. Additionally, we will use linear mixed effects models to assess whether patterns of  
224 changes over the entire 3-year postsurgery period differ in the Tele-CBT and TAU Control  
225 groups while handling the longitudinal and correlated nature of the data.

226 The **secondary hypotheses** are concerned with comparing indicators of medication pill  
227 burden and remission of obesity-related comorbidities as per clinical records. Given the durable  
228 benefit of bariatric surgery on metabolic indices such as T2DM,<sup>20</sup> we will specifically compare

229 complete remission (i.e. A1C<6.0%, fasting plasma glucose (FPG)<6.0 mmol/L, and no  
 230 hypoglycemic medications) in the Tele-CBT and Standard Care Control groups at 2 and 3 years  
 231 post-surgery. Participants will be divided into 3 groups: (1) T2DM, (2) T2DM in partial  
 232 remission (i.e. A1C=6.0-6.4%, fasting plasma glucose (FPG)=6.1-6.9 mmol/L, and no  
 233 hypoglycemic medications), and (3) T2DM in complete remission. We will compare the  
 234 proportions in these three groups between the Tele-CBT and Control groups using a chi-squared  
 235 test on the corresponding 2x3 contingency table. We will also compare Tele-CBT and Control  
 236 groups on the proportions meeting criteria for T2DM remission. The secondary hypotheses are  
 237 also concerned with comparing eating pathology, psychological distress, and quality of life  
 238 measures across the Tele-CBT and Control groups, and the approach for longitudinal analysis of  
 239 the primary outcome will also be used to compare these groups. Despite evidence of sex  
 240 differences among bariatric surgery patients,<sup>22</sup> they have been largely ignored in research on  
 241 psychosocial interventions. Males comprise only 20% of all patients enrolled in bariatric surgery  
 242 programs, a percentage that is not reflective of the sex distribution of extreme obesity. We will  
 243 carry out a subgroup analysis to examine whether the efficacy of Tele-CBT differs between the  
 244 sexes. We will also assess sex differences in the percentage of individuals who decline  
 245 participation in the study, drop out from treatment, or are lost to follow-up.

246  
 247  
 248 **Procedure:**

249  
 250 The proposed 2-arm RCT will examine the efficacy of Tele-CBT delivered 1 year post-  
 251 surgery as an adjunctive treatment to standard bariatric care in a real-world clinical setting. A  
 252 total of 350 bariatric surgery patients will be recruited from the Bariatric Surgery Programs at  
 253 Toronto Western Hospital (TWH-BSP) and Humber River Hospital (HRH-BSP) and be  
 254 randomized to either: 1) Treatment as Usual (i.e., bariatric surgery + routine clinic visits), or 2)  
 255 Tele-CBT (i.e., bariatric surgery + routine clinic visits + post-operative Tele-CBT). See Figure 1  
 256 for Study Design.

257  
 258 **Figure 1: Study Design**

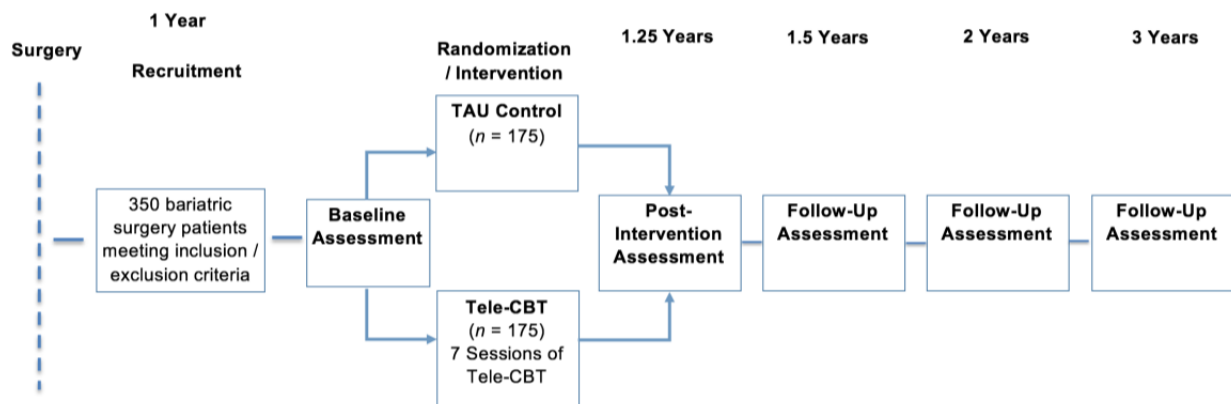

260  
 261  
 262 **Treatment as Usual (Standard Bariatric Care Control):** Participants assigned to the  
 263 Standard Bariatric Care group will attend routine clinic visits at the TWH-BSP. These visits  
 264 generally include education on bariatric surgery and nutrition. Patients meet with select members

265 of the multidisciplinary team at 1 year post surgery with physician follow-up at 2 and 3 year  
266 post-surgery, and may attend an optional monthly support group. Participants' service utilization  
267 (i.e., attendance at optional sessions) will be documented and compared across groups.  
268 Participants will also be asked to weigh themselves during the assessment points that do not  
269 correspond to clinic visits (i.e., 1.25 and 1.5 years post-surgery) and to take a picture of the  
270 weight on the scale to send via email to the study coordinator to increase the reliability of self-  
271 report.

272 **Post-Op Telephone-Based CBT:** The Post-Op Tele-CBT intervention will be delivered one  
273 year following bariatric surgery. According to longitudinal research, as well as our own clinical  
274 data and pilot studies, patients typically experience rapid weight loss during the first 6 months  
275 following surgery with little effort,<sup>55,56</sup> and during this "honeymoon period", have little incentive  
276 to engage in psychosocial interventions. In addition, 1 year post-op was selected because patients  
277 are typically medically stable at this point. In addition, they have not yet entered the high-risk  
278 period for weight regain that typically occurs 1.5 to 2 years following surgery,<sup>55,56</sup> but they do  
279 have to put more effort into losing weight relative to the first 6 months. Participants will receive  
280 6 weekly Tele-CBT sessions and 1 final "booster" session 1 month later, all approximately 55-  
281 minutes in duration and scheduled at a time convenient for the participants. The development of  
282 the Tele-CBT protocol and the content of the sessions, as well as preliminary evidence for the  
283 feasibility, acceptability and efficacy of the protocol, have been previously described by our  
284 team.<sup>52-54</sup> Briefly, the Tele-CBT sessions focus on introducing the cognitive behavioural model  
285 of overeating and obesity, scheduling healthy meals and snacks at regular time intervals and  
286 recording consumption using food records, scheduling pleasurable alternative activities to  
287 overeating, identifying and planning for difficult eating scenarios, and reducing vulnerability to  
288 overeating by solving problems and challenging negative thoughts. Participants are expected to  
289 complete CBT homework between sessions, such as completing food records, engaging in  
290 pleasurable and self-care activities, and completing a variety of worksheets. Three clinical  
291 psychology graduate students and psychiatry residents/fellows will work as study therapists  
292 under the supervision of Drs. Cassin and Sockalingam, respectively. All therapists will receive  
293 training in the Tele-CBT protocol and will have biweekly case supervision meetings. Participants  
294 in this group will also be asked to weigh themselves during the assessment points that do not  
295 correspond to clinic visits (i.e., 1.25 and 1.5 years post-surgery) and to take a picture of the  
296 weight on the scale to send via email to the study coordinator to increase the reliability of self-  
297 report.

298 Participants will be recruited using the same practices that have proven very effective in our  
299 Tele-CBT pilot studies at the TWH-BSP. Specifically, when clinic staff contact patients by  
300 telephone to remind them of their routine clinic visit scheduled for 1, 3, or 12 months post-  
301 surgery, they will ask patients if they are willing to be contacted by a member of the research  
302 team regarding the Tele-CBT study. The research coordinator will subsequently contact those  
303 patients by telephone or e-mail (if the participant consents) to explain the study in greater detail.  
304 Those interested in participating will be provided with the consent form in person at their  
305 appointment to review and sign. Patients who are interested in participating in the study but  
306 cannot come in person to sign the consent form (i.e., those who complete their appointments via  
307 Telehealth Ontario) will be mailed a copy of the consent form with a prepaid return envelope to  
308 review, sign, and mail back. Once patients have provided their consent, they will be screened for  
309 the inclusion/exclusion criteria noted below, and will undergo a diagnostic interview (the MINI  
310 International Neuropsychiatric Inventory<sup>57</sup>) to assess for exclusionary mental disorders. Once

311 screening is complete, eligible and consenting participants will be e-mailed a link to the online  
312 baseline questionnaire packet administered through *Qualtrics* survey software and they will be  
313 weighed when they return to the TWH-BSP for their 12-month post-operative routine clinic visit.  
314 Upon completion of these baseline measures, the research coordinator will randomly assign  
315 participants to either the Tele-CBT group or Control group. Randomization will occur via an  
316 independent central web-based system to ensure allocation concealment with stratification by  
317 sex, given the documented sex differences in bariatric surgery patients.<sup>22</sup> The study  
318 biostatistician will generate the 1:1 randomization sequence with a computerized random number  
319 generator, using a random permuted block design with randomly chosen block sizes.

320

321 **Measures** (See Appendix):

322

### 323 **Self-Report Questionnaires**

324

325 *Patient Health Questionnaire (PHQ-9)*<sup>58</sup> – The PHQ-9 is a 9-item self-report measure of  
326 depression severity. Respondents are asked to rate the frequency with which they have  
327 experienced depressive symptoms over the last two weeks on a scale ranging from 0 (not at all)  
328 to 3 (nearly every day). Scores on the PHQ-9 can range from 0 to 27, and mild, moderate,  
329 moderately severe, and severe levels of depressive symptoms correspond to cut-off scores of 5,  
330 10, 15, and 20 respectively.

331

332 *Generalized Anxiety Disorder Questionnaire (GAD-7)*<sup>59</sup> – The GAD-7 is a 7-item self report  
333 measure of anxiety severity. It was originally developed to diagnose generalized anxiety  
334 disorder, but it has also proved to be a good screening instrument for other disorders including  
335 panic disorder, social phobia, and post-traumatic stress disorder. Respondents are asked to rate  
336 the frequency with which they have experienced anxiety symptoms over the last two weeks on a  
337 scale ranging from 0 (not at all) to 3 (nearly every day). Scores on the GAD-7 can range from 0  
338 to 21, and mild, moderate, and severe levels of anxiety symptoms correspond to cut-off scores on  
339 5, 10, and 15 respectively.

340

341 *Binge Eating Scale (BES)*<sup>60</sup> – The BES is a 16-item self-report measure that assesses the  
342 presence of binge eating behaviour indicative of an eating disorder. It was devised specifically  
343 for use with obese individuals (68). Scores on the BES range from 0 to 46, and moderate and  
344 severe levels of binge eating correspond to cut-off scores of 18 and 27.

345

346 *Loss of Control Over Eating Scale (LOCES-Brief)*<sup>61</sup> – the LOCES-Brief is a 7-item self-  
347 report measure that assesses the behavioural and cognitive aspects of loss of control eating,  
348 which may occur even in the absence of objectively large eating binges.

349

350 *Emotional Eating Scale (EES)*<sup>62</sup> – The EES is a 25-item self-report measure that assesses  
351 the tendency to cope with negative affect by eating. Respondents are presented with 25 emotions  
352 and are asked to rate the strength of their urge to eat on a scale from 1 (no desire to eat) to 5 (an  
353 overwhelming urge to eat) when experiencing each of the emotions. The EES consists of 3  
354 subscales reflecting anger/frustration, anxiety, and depression.

355



356 EuroQol (*EQ-5D-5L*)<sup>63</sup> – The EQ-5D-5L is a 25 item self-report measure of health-  
357 related quality of life. The EQ-5D-5L covers the domains of mobility, self-care, daily activities,  
358 pain/discomfort, and anxiety/depression.  
359

### 360 **Measures of Medical Burden**

361 Assessed at routine clinic visits at 1 year (Pre-Intervention), 2 years, and 3 years following  
362 surgery. Bloodwork on obesity related medical comorbidities are collected as part of routine  
363 clinical follow-up after bariatric surgery and will be accessed through patients' medical records.  
364  
365

- 366 • *Overall medication pill burden* (assessed by physician discontinuation)
- 367 • *Diabetes specific medication burden* (assessed by physician discontinuation)
- 368 • *Sustained remission of obesity related comorbidities* (e.g. hypertension; assessed by  
369 laboratory values)
- 370 • *Sustained remission of Type 2 Diabetes mellitus* (assessed by hemoglobin A1C and  
371 fasting plasma glucose levels)

### 373 **Privacy and Confidentiality:**

374  
375 E-mail correspondence will be sent from a secure UHN e-mail account. Participants will  
376 be notified that security and confidentiality of information cannot be guaranteed through e-mail  
377 correspondence. All rating scales and forms used at each assessment will use a single coding  
378 system, with only the research ID number and study name written on it. Personal health  
379 information is required for determining participant eligibility for the study and to contact the  
380 participant during the study for Tele-CBT sessions. The master code will be kept by the research  
381 coordinator for the duration of the study and will be kept separately from the research data (i.e.,  
382 participant files). Contact information will be used throughout the course of the study and  
383 correspond to the master code. All data and personal health information will be stored in a  
384 locked room in a locked cabinet. Contact information, demographic data, and computerized  
385 rating scales will be stored on a password-protected computer on a secure network drive. A  
386 login name and password will be required to access these files and the computer will be located  
387 in a locked office.  
388

### 389 **Data Transfer Between Sites:**

390  
391 Select data will be transferred from UHN to Ryerson, as listed below. The Tele-CBT  
392 therapists will obtain the contact information of participants from the research coordinator via  
393 telephone so they can contact them for Tele-CBT sessions. The research coordinator will only  
394 provide the participant's name, phone number and email and no other identifying information or  
395 personal health information. The session notes that the therapists write following the Tele-CBT  
396 sessions will be stored in a locked filing cabinet in the secure HEAL lab at Ryerson and only  
397 students working in the HEAL lab as therapists under the supervision of co-PI Dr. Stephanie  
398 Cassin will have access to this information. These notes will only indicate the participant ID and  
399 will not have any patient identifying information. The research coordinator will use the CRR  
400 (clinical research record) function on EPR to indicate on the patient's electronic medical record  
401 that they are currently enrolled in the UHN-based research study.

402  
403 All of the Tele-CBT sessions will be audio-recorded with the use of a password protected digital  
404 audio recorder. All audio-recorded Tele-CBT sessions will be password protected and will  
405 remain at Ryerson until grading for adherence to protocol has been completed, at which time  
406 they will be deleted. Tele-CBT audio recordings will not be transferred back and forth between  
407 sites.

408  
409 No data will be collected from Humber River Hospital. We will be consenting patients from both  
410 UHN and Humber River Hospital, and Humber will be helping to identify patients eligible for  
411 the study. As the Tele-CBT intervention is provided remotely, the process will remain the same  
412 for all UHN and Humber River Hospital consented patients. Data collected from Humber River  
413 Hospital patients will be stored with UHN patient data at UHN on a password-protected  
414 computer or in a locked cabinet within a locked room that only team members can access.  
415 Ryerson's role for Humber River Hospital patients, like UHN patients, are as mentioned above.

416  
417 **Risks and Benefits:**

418  
419 **Risks:**

420  
421 Participants will be asked to reflect upon some personal issues and their psychological health  
422 (e.g., eating habits, mood, anxiety, quality of life) during Cognitive Behavioural Therapy and  
423 while completing the questionnaires. Participants may choose to discontinue Cognitive  
424 Behavioural Therapy or to refuse to answer questions at any time if they experience discomfort.

425  
426 **Benefits:**

427  
428 Our pilot studies suggest that the Tele-CBT intervention improves binge eating,  
429 emotional eating, depression, and anxiety.<sup>65,66</sup> In addition, previous randomized controlled trials  
430 in non-bariatric surgery populations have demonstrated that CBT is efficacious in improving  
431 binge eating<sup>66</sup>, depression<sup>67</sup>, and anxiety<sup>67</sup>. Thus, we believe that patients have the potential to  
432 benefit as a result of taking part in this study.

433  
434 **Implications:**

435  
436 If Tele-CBT is found to be efficacious, it could potentially become the standard of care  
437 for bariatric surgery patients, including those who do not live within driving distance of bariatric  
438 centres or who cannot attend weekly treatment sessions due to practical barriers. Given the  
439 minimal exclusion criteria for this study, most bariatric surgery patients will be eligible to  
440 participate, making the results generalizable to other settings beyond the study recruitment site.  
441 The manualized telephone-based protocol is associated with a low intervention burden for health  
442 care systems and patients, and is thus highly feasible for implementation elsewhere. The  
443 identification of efficacious psychosocial interventions will become increasingly important as the  
444 prevalence of extreme obesity and obesity-related medical comorbidities continue to rise, and as  
445 the number of bariatric surgeries performed each year increases.

446  
447 **Conflicts of Interest:**

448

449           There are no known conflicts of interest.

450

451 **Study Budget:**

452

453           This study is being funded by the Canadian Institutes for Health Research (Project grant  
454 valued at \$489,600).

455

456 **References**

457  
458  
459  
460  
461  
462  
463  
464  
465  
466  
467  
468  
469  
470  
471  
472  
473  
474  
475  
476  
477  
478  
479  
480  
481  
482  
483  
484  
485  
486  
487  
488  
489  
490  
491  
492  
493  
494  
495  
496  
497  
498  
499  
500

1. Di Ruggiero, E., Frank, J., & Moloughney, B. (2004). Strengthen Canada's public health system now. *Canadian Journal of Public Health*, 95, 5-11.
2. Lau, D. C. W., Douketis, J. D., Morrison, K. M., Hramiak, I. M., Sharma, A. M., & Ur, E. (2007). 2006 Canadian clinical practice guidelines on the management and prevention of obesity in adults and children. *Canadian Medical Association Journal*, 176 (8 Suppl), S1-S13.
3. Stewart, S. T., Cutler, D. M., & Rosen, A. B. (2009). Forecasting the effects of obesity and smoking on U.S. life expectancy. *New England Journal of Medicine*, 361, 2252-2260.
4. World Health Organization (2000). *Obesity: Preventing and managing the global epidemic*. WHO Technical Report Series 894.
5. Shields, M., Carroll, M. D., & Ogden, C. L. (2011). Adult obesity prevalence in Canada and the United States. *NCSH Data Brief*, number 56. Hyattsville, MD: National Centre for Health Statistics.
6. Flegal, K.M., Carroll, M.D., Ogden, C.L., & Johnson, C.L. (2002). Prevalence and trends in obesity among US adults, 1999-2000. *Journal of the American Medical Association*, 288, 1723-1727.
7. Sturm, R. (2003). Increases in clinically severe obesity in the United States, 1986-2000. *Archives of Internal Medicine*, 163, 2146-2148.
8. Bray, G. (2004). Medical consequences of obesity. *The Journal of Clinical Endocrinology and Metabolism*, 89, 2583-2589.
9. Guh, D. P., Zhang, W., Bansback, N., Amarsi, Z., Birmingham, L., & Anis, A. H. (2009). The incidence of comorbidities related to obesity and overweight: A systematic review and metaanalysis. *Biomed Central (BMC) Public Health*, 9, 88-108.
10. Padwal, R. S., Pajewski, N. M., Allison, D. B., & Sharma, A. M. (2011). Using the Edmonton obesity staging system to predict mortality in a population-representative cohort of people with overweight and obesity. *Canadian Medical Association Journal*, 183, E1059-1066.
11. National Institute for Health and Clinical Excellence (2006). *Obesity: Guidance on the prevention, identification, assessment, and management of overweight and obesity in adults and children* (NICE clinical guideline 43). London: National Institute for Health and Clinical Excellence.
12. Buchwald, H., & Williams, S. E. (2004). Bariatric surgery worldwide 2003. *Obesity Surgery*, 14, 1157-1164.

- 501 13. Samuel, I., Mason, E., Renquist, K., Huang, Y., Zimmerman, M., & Jamal, M. (2006).  
502 Bariatric surgery trends: An 18-year report from the International Bariatric Surgery Registry.  
503 *American Journal of Surgery*, 192, 657-662.  
504
- 505 14. Mechanick, J. I., Kushner, R. F., Sugarman, H. J., Gonzales-Campoy, J. M., Collazo-Clavell,  
506 M. L., Spitz, A. F., et al. (2009). American Association of Clinical Endocrinologists, The Obesity  
507 Society, and American Society for Metabolic and Bariatric Surgery medical guidelines for  
508 clinical practice for the perioperative nutritional, metabolic, and non-surgical support of the  
509 bariatric surgery patient. *Obesity*, 17 (Suppl1), S1-S70.  
510
- 511 15. Tadross, J. A., & le Roux, C. W. (2009). The mechanisms of weight loss after bariatric  
512 surgery. *International Journal of Obesity*, 33, S28-S32.  
513
- 514 16. Adams, T. D., Pendleton, R. C., Strong, M. G., Kolotkin, R. L., Walker, J. M., Litwin, S. E.,  
515 et al. (2010). Health outcomes of gastric bypass patients compared to nonsurgical nonintervened  
516 severely obese. *Obesity*, 18, 121-130.  
517
- 518 17. Sjostrom, L., Narbo, K., Sjostrom, C. D., Karason, K., Larsson, B., Wedel, H., et al. (2007).  
519 Effects of bariatric surgery on mortality in Swedish obese subjects. *New England Journal of*  
520 *Medicine*, 357, 741-752.  
521
- 522 18. Buchwald, H., Avidor, Y., Braunwald, E., Jensen, M. D., Pories, W., Fahrenbach, K., et al.  
523 (2004). Bariatric surgery: a systematic review and meta-analysis. *Journal of the American*  
524 *Medical Association*, 292, 1724-1737.  
525
- 526 19. Shah, M., Simha, V., & Garg, A. (2006). Long term impact of bariatric surgery on body  
527 weight, comorbidities and nutritional status. *The Journal of Clinical Endocrinology &*  
528 *Metabolism*, 91, 4223-4231.  
529
- 530 20. Courcoulas, A. P., Christian, N. J., Belle, S. H., Berk, P. D., Flum, D. R., Garcia, L.,  
531 et al. (2013). Weight change and health outcomes at 3 years after bariatric surgery among  
532 individuals with severe obesity. *Journal of the American Medical Association*, 310, 2416-2425.  
533
- 534 21. Magro, D. O., Geloneze, B., Delfini, R., Pereja, B. C., Callejas, F., & Pereja, J. C. (2008).  
535 Longterm weight regain after gastric bypass: A 5-year prospective study. *Obesity Surgery*, 18,  
536 648-651.  
537
- 538 22. DiGiorgi, M., Rosen, D. J., Choi, J. J., Milone, L., Schrope, B., Olivero-Rivera, L. et al.  
539 (2010). Re-emergence of diabetes after gastric bypass in patients with mid- to long-term follow-  
540 up. *Surgery for Obesity and Related Diseases*, 6, 249-253.  
541
- 542 23. Shah, M., Simha, V., & Garg, A. (2006). Long term impact of bariatric surgery on body  
543 weight, comorbidities and nutritional status. *The Journal of Clinical Endocrinology &*  
544 *Metabolism*, 91, 4223-4231.  
545

- 546  
547 24. Meany, G., Conceicao, E., & Mitchell, J. E. (2014). Binge eating, binge eating disorder, and  
548 loss of control eating: Effects on weight outcomes after bariatric surgery. *European Eating*  
549 *Disorders Review*, 22, 87-91.  
550  
551 25. Sheets, C., Peat, C., Berg, K., White, E., Bocchieri-Ricciardi, L., Chen, E., & Mitchell, J. E.  
552 (2015). Post-operative psychosocial predictors of outcome in bariatric surgery. *Obesity Surgery*,  
553 25, 330-345.  
554  
555 26. Muhlans, B., Horbach, T., De Zwaan, M. (2009). Psychiatric disorders in bariatric surgery  
556 candidates. A review of the literature and results of a German prebariatric surgery sample.  
557 *General Hospital Psychiatry*, 31, 414-421.  
558  
559 27. Kalarchian, M. A., & Marcus, M. D. (2015). Psychosocial interventions pre and post bariatric  
560 surgery. *European Eating Disorders Review*, 23, 457-462.  
561  
562 28. Beck, N. N., Johannsen, M., Stoving, R. K., Mehlsen, M., & Zachariae, R. (2012). Do  
563 postoperative psychotherapeutic interventions and support groups influence weight loss  
564 following bariatric surgery? A systematic review and meta-analysis of randomized and  
565 nonrandomized trials. *Obesity Surgery*, 22, 1790-1797.  
566  
567 29. National Institute for Health and Care Excellence. Depression in adults: Recognition and  
568 management. NICE clinical guideline 90. 2009. <http://www.nice.org.uk/guidance/cg90>.  
569  
570 30. National Institute for Health and Care Excellence. *Eating disorders in over 8's:*  
571 *Management*. NICE clinical guideline 9. 2004. <http://www.nice.org.uk/guidance/cg9>.  
572  
573 31. Cooper, Z., Doll, H. A., Hawker, D. M., Bryne, S., Bonner, G., Eeley, E., et al. (2010).  
574 Testing a new cognitive behavioral treatment for obesity: A randomized controlled trial with  
575 three year follow-up. *Behavior Research and Therapy*, 48, 706-713.  
576  
577 32. Werrij, M. Q., Jansen, A., Mulkens, S., Elgersma, H. J., Ament, A., Hospers, H. J. (2009).  
578 Adding cognitive therapy to dietetic treatment is associated with less relapse in obesity. *Journal*  
579 *of Psychosomatic Research*, 67, 315-324.  
580  
581 33. Cassin, S. E., & Atwood, M. E. (in press). Cognitive behavioural therapy for severe obesity.  
582 In S Sockalingam & R. Hawa (Eds.), *Psychiatric care in severe obesity: An interdisciplinary*  
583 *guide to integrated care*. New York, NY: Springer.  
584  
585 34. Atwood, M. E., David, L., & Cassin, S. E. (in press). Cognitive behavioural therapy for  
586 bariatric surgery patients. In R. Rajendram, C. Martin, & V. R. Preedy (Eds.), *Pathophysiology*  
587 *of bariatric surgery: Metabolism, nutrition, procedures, outcomes and adverse effects*. London,  
588 UK: Academic Press.  
589

- 590 35. Kalarchian, M. A., Marcus, M. D., Courcoulas, A. P., Cheng, Y., Levine, M. D., & Josbeno,  
591 D. (2012). Optimizing long-term weight control after bariatric surgery: A pilot study. *Surgery for*  
592 *Obesity and Related Diseases*, 8, 710-715.  
593
- 594 36. Gade, H., Friberg, O., Rosenvinge, J. H., Småstuen, M. C., & Hjelmæsæth, J. (2015). The  
595 impact of a preoperative cognitive behavioural therapy (CBT) on dysfunctional eating  
596 behaviours, affective symptoms and body weight 1 year after bariatric surgery: A randomized  
597 controlled trial. *Obesity Surgery*, 25, 2112-2119.  
598
- 599 37. King, W. C., Engel, S. G., Elder, K. A., et al. (2012). Walking capacity of bariatric surgery  
600 candidates. *Surgery for Obesity and Related Diseases*, 8, 48-59.  
601
- 602 38. Lara, M. D., Baker, M. T., Larson, C. J., Mathiason, M. A., Lambert, P. J., & Kothari, S. N.  
603 (2005). Travel distance, age, and sex as factors in follow-up visit compliance in the post-gastric  
604 bypass population. *Surgery for Obesity and Related Diseases*, 1, 17-21.  
605
- 606 39. Sockalingam, S., Cassin, S. E., Hawa, R., Khan, A., Wnuk, S., & Okrainec, A. (2013).  
607 Predictors of postbariatric surgery appointment attendance: The role of attachment style. *Obesity*  
608 *Surgery* (Epub ahead of print).  
609
- 610 40. Lara, M. D., Baker, M. T., Larson, C. J., Mathiason, M. A., Lambert, P. J., & Kothari, S. N.  
611 (2005). Travel distance, age, and sex as factors in follow-up visit compliance in the post-gastric  
612 bypass population. *Surgery for Obesity and Related Diseases*, 1, 17-21.  
613
- 614 41. Moroshko, I., Brennan, L., & O'Brien, P. (2012). Predictors of attrition in bariatric aftercare:  
615 A systematic review of the literature. *Obesity Surgery* (online first).  
616
- 617 42. Hart, S. L., & Hart, T. A. (2010). The future of cognitive behavioural interventions within  
618 behavioural medicine. *Journal of Cognitive Psychotherapy*, 24, 344-353.  
619
- 620 43. Eakin, E. G., Lawler, S. P., Vandelanotte, C., & Owen, N. (2007). Telephone interventions  
621 for physical activity and dietary behaviour change: A systematic review. *American Journal of*  
622 *Preventative Medicine*, 32, 419-434.  
623
- 624 44. Wells, A. M., Garvin, V., Dohm, F. A., & Striegel-Moore, R. H. (1997). Telephone based  
625 guided self-help for binge eating disorder: A feasibility study. *International Journal of Eating*  
626 *Disorders*, 21, 341-346.  
627
- 628 45. Ludman, E. J., Simon, G. E., Tutty, S., & Von Korff, M. (2007). A randomized trial of  
629 telephone psychotherapy and pharmacotherapy for depression: Continuation and durability of  
630 effects. *Journal of Consulting and Clinical Psychology*, 75, 257-266.  
631
- 632 46. Mohr, D. C., Hart, S., L., Julian, L., Catledge, C., Honos-Webb, L., Vella, L., & Tasch, E. T.  
633 (2005). Telephone-administered psychotherapy for depression. *Archives of General Psychiatry*,  
634 62, 1007-1014.  
635



- 636 47. Tutty, S., Sprangler, D. L., Poppleton, L. E., Ludman, E. J., & Simon, G. E. (2010).  
637 Evaluating the evidence of cognitive behavioural teletherapy in depressed adults. *Behaviour*  
638 *Therapy*, *41*, 229-236.  
639
- 640 48. Tutty, S., Ludman, E. J., & Simon, G., (2005). Feasibility and acceptability of a telephone  
641 psychotherapy program for depressed adults treated in primary care. *General Hospital*  
642 *Psychiatry*, *27*, 400-410.  
643
- 644 49. Mohr, D. C., Ho, J., Duffecy, J., Reifler, D., Sokol, L., Burns, M. N., et al. (2012). Effect of  
645 telephone-administered versus face-to-face cognitive behavioural therapy on adherence to  
646 therapy and depression outcomes among primary care patients. *Journal of the American Medical*  
647 *Association*, *307*, 2278-2285.  
648
- 649 50. Young, J. & Beck, A. T. (1980). *The Cognitive Therapy Scale rating manual*. Bala Cynwyd,  
650 MD: Beck *Institute* for Cognitive Behaviour Therapy.  
651
- 652 51. Totten, A. M., Womack, D. M., Eden, K. B., McDonagh, M. S., Griffin, J. C., Grusing, S.,  
653 Hersh, W. R. Telehealth: Mapping the evidence for patient outcomes from systematic reviews.  
654 Technical Brief No. 26. (Prepared by the Pacific Northwest Evidence-based Practice Center  
655 under Contract No. 290-2015-00009-I.) AHRQ Publication No.16-EHC034-EF. Rockville, MD:  
656 Agency for Healthcare Research and Quality; June 2016.  
657 [www.effectivehealthcare.ahrq.gov/reports/final.cfm](http://www.effectivehealthcare.ahrq.gov/reports/final.cfm).  
658
- 659 52. Cassin, S. E., Sockalingam, S., Wnuk, S., Strimas, R., Royal, S., Hawa, R., & Parikh, S. V.  
660 (2013). Cognitive behavioural therapy for bariatric surgery patients: Preliminary evidence for  
661 feasibility, acceptability, and effectiveness. *Cognitive and Behavioural Practice*, *20*, 529-543.  
662
- 663 53. Cassin, S. E., Sockalingam, S., Du, C., Wnuk, S., Hawa, R., & Parikh, S. (2016). A pilot  
664 randomized controlled trial of telephone-based cognitive behavioural therapy for preoperative  
665 bariatric surgery patients. *Behaviour Research and Therapy*, *80*, 17-22.  
666
- 667 54. Sockalingam, S., Cassin, S. E., Wnuk, S., Du, C., Jackson, T., Hawa, R., & Parikh, S. (in  
668 press). A pilot study on telephone cognitive behavioural therapy for patients six months post-  
669 bariatric surgery. *Obesity Surgery*.  
670
- 671 55. Karlsson, J., Sjostrom, L., & Sullivan, M. (1998). Swedish Obese Subjects (SOS) an  
672 intervention study of obesity. Two-year follow-up of health-related quality of life and eating  
673 behaviour after gastric surgery for extreme obesity. *International Journal of Obesity*, *22*, 113-  
674 126.  
675
- 676 56. Ryden, A., & Torgerson, J. S. (2006). The Swedish obese subjects study—What has been  
677 accomplished to date? *Surgery for Obesity and Related Diseases*, *2*, 549-560.  
678  
679



- 680 57. Sheehan, D. V., Lecrubier, Y., Sheehan, K. H., Amorim, P., Janavs, J., Weiller, E., Herqueta,  
681 T., Baker, R., & Dunbar, G. C. (1998). The Mini-International Neuropsychiatric Interview for  
682 DSMIV and ICD-10. *Journal of Clinical Psychiatry*, 59 (Suppl 20), 22-33.  
683
- 684 58. Spitzer, R. L., Kroenke, K., Williams, J. B., & The Patient Health Questionnaire Primary  
685 Care Study Group. (1999). Validation and utility of a self-report version of PRIME-MD: the  
686 PHQ primary care study. *JAMA: The Journal of the American Medical Association*, 282, 1737-  
687 1744.  
688
- 689 59. Spitzer, R. L., Kroenke, K., Williams, J. B. W., & Lowe, B. (2006). A brief measure for  
690 assessing generalized anxiety disorder – the GAD-7. *Archives of Internal Medicine*, 166, 1092-  
691 1097.  
692
- 693 60. Gormally, J., Black, S., Daston, S., & Rardin, D. (1982). The assessment of binge eating  
694 severity among obese persons. *Addictive Behaviors*, 7, 47–55.  
695
- 696 61. Latner, J., Mond, J. M., Kelly, M. C., Haynes, S. N., & Hay, P. J. (2014). The loss of control  
697 over eating scale: Development and psychometric evaluation. *International Journal of Eating*  
698 *Disorders*, 47, 647-659.  
699
- 700 62. Arnow, B., Kenardy, J., & Agras, W. S. (1995). The Emotional Eating Scale: The  
701 development of a measure to assess coping with negative affect by eating. *International Journal*  
702 *of Eatin Disorders*, 18, 79-90.  
703
- 704 63. EuroQol Group, EuroQol (1990). A new facility for the measurement of health-related  
705 quality of life. *Health Policy*, 16, 199-208.  
706
- 707 64. Cassin, S. E., Sockalingam, S., Du, C., Wnuk, S., Hawa, R., & Parikh, S. (2016). A pilot  
708 randomized controlled trial of telephone-based cognitive behavioural therapy for preoperative  
709 bariatric surgery patients. *Behaviour Research and Therapy*, 80, 17-22.  
710
- 711 65. Sockalingam, S., Cassin, S. E., Wnuk, S., Du, C., Jackson, T., Hawa, R., & Parikh, S. (2017).  
712 A pilot study on telephone cognitive behavioural therapy for patients six months post-bariatric  
713 surgery. *Obesity Surgery*, 27, 670-675.  
714
- 715 66. Brownley, K. A., Berkman, N. D., Sedway, J., A., Lohr, K. N., & Bulik, C. M. (2007).  
716 Binge eating disorder treatment: A systematic review of randomized controlled trials.  
717 *International Journal of Eating Disorders*, 40, 337-348.  
718
- 719 67. Tolin, D. F. (2010). Is cognitive behavioural therapy more effective than other therapies? A  
720 meta-analytic review. *Clinical Psychology Review*, 30, 710-720.  
721  
722  
723  
724

725 Appendix: Measures

726 Patient Health Questionnaire or PHQ-9

727

728 Over the last 2 weeks, how often have you been bothered by any of the following problems?

729 Please circle the appropriate number.

730

|                                                                                                                                                                             | Not at all | Several days | More than half the days | Nearly every day |
|-----------------------------------------------------------------------------------------------------------------------------------------------------------------------------|------------|--------------|-------------------------|------------------|
| 1. Little interest or pleasure in doing things                                                                                                                              | 0          | 1            | 2                       | 3                |
| 2. Feeling down, depressed, or hopeless                                                                                                                                     | 0          | 1            | 2                       | 3                |
| 3. Trouble falling or staying asleep, or sleeping too much                                                                                                                  | 0          | 1            | 2                       | 3                |
| 4. Feeling tired or having little energy                                                                                                                                    | 0          | 1            | 2                       | 3                |
| 5. Poor appetite or overeating                                                                                                                                              | 0          | 1            | 2                       | 3                |
| 6. Feeling bad about yourself – or that you are a failure or have let yourself or your family down                                                                          | 0          | 1            | 2                       | 3                |
| 7. Trouble concentrating on things, such as reading the newspaper or watching television                                                                                    | 0          | 1            | 2                       | 3                |
| 8. Moving or speaking so slowly that other people could have noticed. Or the opposite – being so fidgety or restless that you have been moving around a lot more than usual | 0          | 1            | 2                       | 3                |
| 9. Thoughts that you would be better off dead or of hurting yourself in some way                                                                                            | 0          | 1            | 2                       | 3                |

|                                                                       |  |   |                     |         |         |   |
|-----------------------------------------------------------------------|--|---|---------------------|---------|---------|---|
| <i>(For staff coding: Total Score _____ = _____ + _____ + _____ )</i> |  |   |                     |         |         |   |
| <b>PHQ 9</b>                                                          |  | = | _____               | + _____ | + _____ | ) |
|                                                                       |  |   | <b>Reviewed by:</b> | _____   |         |   |

If you check off any of these problems, how difficult have these problems made it for you to do your work, take care of things at home, or get along with other people?

|                      |                    |                |                     |
|----------------------|--------------------|----------------|---------------------|
| Not at all difficult | Somewhat difficult | Very difficult | Extremely difficult |
| €                    | €                  | €              | €                   |

731  
732

733  
734  
735  
736  
737

**Generalized Anxiety Disorder 7 or GAD-7**

**Over the last 2 weeks, how often have you been bothered by any of the following problems?  
Please circle the appropriate number.**

---

|                                                      | <b>Not at<br/>all</b> | <b>Several<br/>days</b> | <b>More than<br/>half the<br/>days</b> | <b>Nearly<br/>every<br/>day</b> |
|------------------------------------------------------|-----------------------|-------------------------|----------------------------------------|---------------------------------|
| 1. Feeling nervous, anxious or on edge               | 0                     | 1                       | 2                                      | 3                               |
| 2. Not being able to stop or control worrying        | 0                     | 1                       | 2                                      | 3                               |
| 3. Worrying too much about different things          | 0                     | 1                       | 2                                      | 3                               |
| 4. Trouble relaxing                                  | 0                     | 1                       | 2                                      | 3                               |
| 5. Being so restless that it is hard to sit still    | 0                     | 1                       | 2                                      | 3                               |
| 6. Becoming easily annoyed or irritable              | 0                     | 1                       | 2                                      | 3                               |
| 7. Feeling afraid as if something awful might happen | 0                     | 1                       | 2                                      | 3                               |

---

738  
739

740  
741  
742  
743  
744  
745  
746  
747  
748

**Loss of Control Over Eating Scale or LOCES**

In the **past month**, how often have you had the following experiences during a time when you were eating? Please respond to each item using the following scale:

1            2            3            4            5  
Never      Rarely      Occasionally      Often      Always

| <b>IN THE PAST MONTH:</b>                                                         | <b>Never</b> | <b>Rarely</b> | <b>Occasionally</b> | <b>Often</b> | <b>Always</b> |
|-----------------------------------------------------------------------------------|--------------|---------------|---------------------|--------------|---------------|
| 1. I continued to eat past the point when I wanted to stop.                       | 1            | 2             | 3                   | 4            | 5             |
| 2. I felt like I had “blown it” and might as well keep eating.                    | 1            | 2             | 3                   | 4            | 5             |
| 3. I felt helpless about controlling my eating.                                   | 1            | 2             | 3                   | 4            | 5             |
| 4. My eating felt like a ball rolling down a hill that just kept going and going. | 1            | 2             | 3                   | 4            | 5             |
| 5. I found myself eating despite negative consequences.                           | 1            | 2             | 3                   | 4            | 5             |
| 6. I felt like the craving to eat overpowered me.                                 | 1            | 2             | 3                   | 4            | 5             |
| 7. I felt like I could not do anything other than eat.                            | 1            | 2             | 3                   | 4            | 5             |

749  
750  
751

752

### Binge Eating Scale or BES

753

754 Below are groups of numbered statements. Read all of the statements in each group and **circle the**  
755 **one** that best describes the way you feel about your eating behavior.

756

7571.

- 758 1. I don't feel self-conscious about my weight or body size when I'm with others.
- 759 2. I feel concerned about how I look to others, but it normally does not make me feel  
760 disappointed with myself.
- 761 3. I do get self-conscious about my appearance and weight which makes me feel disappointed  
762 in myself.
- 763 4. I feel very self-conscious about my weight and frequently, I feel intense shame and disgust  
764 for myself. I try to avoid social contacts because of my self-consciousness.

765

7662.

- 767 1. I don't have any difficulty eating slowly in the proper manner.
- 768 2. Although I seem to "gobble down" foods, I don't end up feeling stuffed because of eating  
769 too much.
- 770 3. At times, I tend to eat quickly and then, I feel uncomfortably full afterwards.
- 771 4. I have the habit of bolting down my food, without really chewing it. When this happens I  
772 usually feel uncomfortably stuffed because I've eaten too much.

7733.

- 774 1. I feel capable to control my eating urges when I want to.
- 775 2. I feel like I have failed to control my eating more than the average person.
- 776 3. I feel utterly helpless when it comes to feeling in control of my eating urges.
- 777 4. Because I feel so helpless about controlling my eating I have become very desperate  
778 about trying to get in control.

779

7804.

- 781 1. I don't have the habit of eating when I'm bored.
- 782 2. I sometimes eat when I'm bored, but often I'm able to "get busy" and get my mind off  
783 food.
- 784 3. I have a regular habit of eating when I'm bored, but occasionally, I can use some other  
785 activity to get my mind off eating.
- 786 4. I have a strong habit of eating when I'm bored. Nothing seems to help me break the habit.

787

7885.

- 789 1. I'm usually physically hungry when I eat something.
- 790 2. Occasionally, I eat something on impulse even though I really am not hungry.
- 791 3. I have the regular habit of eating foods, that I might not really enjoy, to satisfy a hungry  
792 feeling even though physically, I don't need the food.
- 793 4. Even though I'm not physically hungry, I get a hungry feeling in my mouth that only  
794 seems to be satisfied when I eat a food, like a sandwich, that fills my mouth. Sometimes,  
795 when I eat the food to satisfy my mouth hunger, I then spit the food out so I won't gain  
796 weight.

797

7986.

- 799 1. I don't feel any guilt or self-hate after I overeat.
- 800 2. After I overeat, occasionally I feel guilt or self-hate.
- 801 3. Almost all the time I experience strong guilt or self-hate after I overeat.
- 802 4. I almost always feel a strong sense of guilt or regret after I overeat.

803

8047.

- 805 1. I don't lose total control of my eating when dieting even after periods when I overeat.
- 806 2. Sometimes when I eat a "forbidden food" on a diet, I feel like I "blew it" and eat even
- 807 more.
- 808 3. Frequently, I have the habit of saying to myself, "I've blown it now, why not go all the
- 809 way" when I overeat on a diet. When that happens I eat even more.
- 810 4. I have a regular habit of starting strict diets for myself, but I break the diets by going on
- 811 an eating binge. My life seems to be either a "feast" or "famine."

812

813

814

815

816

817

818

8198.

- 820 1. I rarely eat so much food that I feel uncomfortably stuffed afterwards.
- 821 2. Usually about once a month, I eat such a quantity of food, I end up feeling very stuffed.
- 822 3. I have regular periods during the month when I eat large amounts of food, either at
- 823 mealtime or at snacks.
- 824 4. I eat so much food that I regularly feel quite uncomfortable after eating and sometimes a
- 825 bit nauseous.

826

8279.

- 828 1. My level of calorie intake does not go up very high or go down very low on a regular
- 829 basis.
- 830 2. Sometimes after I overeat, I will try to reduce my caloric intake to almost nothing to
- 831 compensate for the excess calories I've eaten.
- 832 3. I have a regular habit of overeating during the night. It seems that my routine is not to be
- 833 hungry in the morning but overeat in the evening.
- 834 4. In my adult years, I have had week-long periods where I practically starve myself. This
- 835 follows periods when I overeat. It seems I live a life of either "feast or famine."

836

83710.

- 838 1. I usually am able to stop eating when I want to. I know when "enough is enough."
- 839 2. Every so often, I experience a compulsion to eat which I can't seem to control.
- 840 3. Frequently, I experience strong urges to eat which I seem unable to control, but at other
- 841 times I can control my eating urges.
- 842 4. I feel incapable of controlling urges to eat. I have a fear of not being able to stop eating
- 843 voluntarily.

844

**84511.**

846

1. I don't have any problem stopping eating when I feel full.

847

2. I usually can stop eating when I feel full but occasionally overeat leaving me feeling uncomfortably stuffed.

848

849

3. I have a problem stopping eating once I start and usually I feel uncomfortably stuffed after I eat a meal.

850

851

4. Because I have a problem not being able to stop eating when I want, I sometimes have to induce vomiting to relieve my stuffed feeling.

852

853

**85412.**

855

1. I seem to eat just as much when I'm with others (family, social gatherings) as when I'm by myself.

856

857

2. Sometimes, when I'm with other persons, I don't eat as much as I want to eat because I'm self-conscious about my eating.

858

859

3. Frequently, I eat only a small amount of food when others are present, because I'm very embarrassed about my eating.

860

861

4. I feel so ashamed about overeating that I pick times to overeat when I know no one will see me. I feel like a "closet eater."

862

863

864

**86513.**

866

1. I eat three meals a day with only an occasional between meal snack.

867

2. I eat 3 meals a day, but I also normally snack between meals.

868

3. When I am snacking heavily, I get in the habit of skipping regular meals.

869

4. There are regular periods when I seem to be continually eating, with no planned meals.

870

**87114.**

872

1. I don't think much about trying to control unwanted eating urges.

873

2. At least some of the time, I feel my thoughts are pre-occupied with trying to control my eating urges.

874

875

3. I feel that frequently I spend much time thinking about how much I ate or about trying not to eat anymore.

876

877

4. It seems to me that most of my waking hours are pre-occupied by thoughts about eating or not eating. I feel like I'm constantly struggling not to eat.

878

879

**88015.**

881

1. I don't think about food a great deal.

882

2. I have strong cravings for food but they last only for brief periods of time.

883

3. I have days when I can't seem to think about anything else but food.

884

4. Most of my days seem to be pre-occupied with thoughts about food. I feel like I live to eat.

885

886

**88716.**

888

1. I usually know whether or not I'm physically hungry. I take the right portion of food to satisfy me.

889

- 890
- 891
- 892
- 893
- 894
2. Occasionally, I feel uncertain about knowing whether or not I'm physically hungry. At these times it's hard to know how much food I should take to satisfy me.
  3. Even though I might know how many calories I should eat, I don't have any idea what is a "normal" amount of food for me.



895  
896

**Emotional Eating Scale or EES**

897We all respond to different emotions in different ways. Some types of feelings lead people to  
898experience an urge to eat. Please indicate the extent to which the following feelings lead you to  
899feel an urge to eat by checking the appropriate box.

900  
901

|     |             | No Desire to Eat | A Small Desire to Eat | A Moderate Desire to Eat | A Strong Urge to Eat | An Overwhelming Urge to Eat |
|-----|-------------|------------------|-----------------------|--------------------------|----------------------|-----------------------------|
| 1.  | Resentful   | 1                | 2                     | 3                        | 4                    | 5                           |
| 2.  | Discouraged | 1                | 2                     | 3                        | 4                    | 5                           |
| 3.  | Shaky       | 1                | 2                     | 3                        | 4                    | 5                           |
| 4.  | Worn Out    | 1                | 2                     | 3                        | 4                    | 5                           |
| 5.  | Inadequate  | 1                | 2                     | 3                        | 4                    | 5                           |
| 6.  | Excited     | 1                | 2                     | 3                        | 4                    | 5                           |
| 7.  | Rebellious  | 1                | 2                     | 3                        | 4                    | 5                           |
| 8.  | Blue        | 1                | 2                     | 3                        | 4                    | 5                           |
| 9.  | Jittery     | 1                | 2                     | 3                        | 4                    | 5                           |
| 10. | Sad         | 1                | 2                     | 3                        | 4                    | 5                           |
| 11. | Uneasy      | 1                | 2                     | 3                        | 4                    | 5                           |
| 12. | Irritated   | 1                | 2                     | 3                        | 4                    | 5                           |
| 13. | Jealous     | 1                | 2                     | 3                        | 4                    | 5                           |
| 14. | Worried     | 1                | 2                     | 3                        | 4                    | 5                           |
| 15. | Frustrated  | 1                | 2                     | 3                        | 4                    | 5                           |
| 16. | Lonely      | 1                | 2                     | 3                        | 4                    | 5                           |
| 17. | Furious     | 1                | 2                     | 3                        | 4                    | 5                           |
| 18. | On edge     | 1                | 2                     | 3                        | 4                    | 5                           |
| 19. | Confused    | 1                | 2                     | 3                        | 4                    | 5                           |
| 20. | Nervous     | 1                | 2                     | 3                        | 4                    | 5                           |
| 21. | Angry       | 1                | 2                     | 3                        | 4                    | 5                           |
| 22. | Guilty      | 1                | 2                     | 3                        | 4                    | 5                           |
| 23. | Bored       | 1                | 2                     | 3                        | 4                    | 5                           |
| 24. | Helpless    | 1                | 2                     | 3                        | 4                    | 5                           |
| 25. | Upset       | 1                | 2                     | 3                        | 4                    | 5                           |

## EuroQol EQ-5D-5L

902  
903  
904 Please click the ONE box that best describes your health TODAY.

### 905 **MOBILITY**

906 Choose one of these items / levels

- 907  
908 I have no problems in walking about €  
909 I have slight problems in walking about €  
910 I have moderate problems in walking about €  
911 I have severe problems in walking about €  
912 I am unable to walk about €  
913

### 914 **SELF-CARE**

915 Choose one of these items / levels

- 916  
917 I have no problems washing or dressing myself €  
918 I have slight problems washing or dressing myself €  
919 I have moderate problems washing or dressing myself €  
920 I have severe problems washing or dressing myself €  
921 I am unable to wash or dress myself €  
922

### 923 **USUAL ACTIVITIES** (e.g. work, study, housework, family or leisure activities)

924 Choose one of these items / levels

- 925  
926 I have no problems doing my usual activities €  
927 I have slight problems doing my usual activities €  
928 I have moderate problems doing my usual activities €  
929 I have severe problems doing my usual activities €  
930 I am unable to do my usual activities €  
931

### 932 **PAIN / DISCOMFORT**

933 Choose one of these items / levels

- 934  
935 I have no pain or discomfort €  
936 I have slight pain or discomfort €  
937 I have moderate pain or discomfort €  
938 I have severe pain or discomfort €  
939 I have extreme pain or discomfort €  
940

941

942

943 **ANXIETY / DEPRESSION**

944 Choose one of these items / levels

945

946 I am not anxious or depressed €

947 I am slightly anxious or depressed €

948 I am moderately anxious or depressed €

949 I am severely anxious or depressed €

950 I am extremely anxious or depressed €

951

952

**The best health  
you can imagine**

**100**

953

**90**

954

955

**80**

956

957

**70**

958

959

**60**

**50**

**40**

**30**

**20**

**10**

**0**

**The worst health  
you can imagine**

- We would like to know how good or bad your health is TODAY.
- This scale is numbered from 0 to 100.
- 100 means the best health you can imagine.
- 0 means the worst health you can imagine.
- Please click on the scale to indicate how your health is TODAY.
