# Supplementary material for: Efficacy of Telephone-Based Cognitive Behavioral Therapy for Weight Loss, Disordered Eating, and Psychological Distress After Bariatric Surgery: A Randomized Clinical Trial
Source: PubMed Central journal article supplement (PMC10401302; doi:10.1001/jamanetworkopen.2023.27099), 2023-08-03
Supplement: jamanetwopen-e2327099-s003.pdf [file jamanetwopen-e2327099-s003.pdf]

## **Data Sharing Statement**

Sockalingam. Efficacy of Telephone-Based Cognitive Behavioral Therapy for Weight Loss, Disordered Eating, and Psychological Distress After Bariatric Surgery: A Randomized Clinical Trial. *JAMA Netw Open*. Published online August 3, 2023 . doi:10.1001/jamanetworkopen.2023.27099

## **Data**

**Data available:** No
